# Supplementary material for: Mean daily temperatures can predict the thermal limits of malaria transmission better than rate summation
Source: PubMed Central journal article supplement — bioRxiv. 2024 Sep 23:2024.09.20.614098. Preprint. [Version 1] doi: 10.1101/2024.09.20.614098 (PMC11463682; doi:10.1101/2024.09.20.614098), 2024-09-23
Supplement: media-1.pdf [file media-1.pdf]

963 **Supplemental Information for:**  
964 Mean daily temperatures can predict the thermal limits of malaria transmission  
965 better than rate summation.  
966

967 **Table of Contents**

- 968 1. **Table S1:** Deviance information criterion (DIC) values used to compare TPCs for adult  
969 mosquito traits fit with quadratic and Brière functions.
- 970 2. **Table S2:** Deviance information criterion (DIC) values used to compare fluctuation  
971 treatments for adult mosquito traits.
- 972 3. **Table S3:** Properties of thermal performance curves (TPCs) for adult mosquito traits in  
973 constant and fluctuating temperatures
- 974 4. **Table S4:** Predicted thermal suitability for transmission for five different models.
- 975 5. **Table S5:** Properties of thermal performance curves (TPCs) for other mosquito and  
976 pathogen traits using data from previous studies in constant conditions.
- 977 6. **Figure S1:** Sensitivity Analysis 1 of suitability models – partial derivatives.
- 978 7. **Figure S2:** Sensitivity Analysis 2 of suitability models – holding single parameters  
979 constant.
- 980 8. **Figure S3:** Uncertainty Analysis of suitability models.
- 981 9. **Supplemental Methods:**
- 982 a. Trait TPC model specifications
- 983 b. Parton-Logan model for diurnal temperature fluctuations

984 **Table S1. Deviance information criterion (DIC) values used to compare TPCs for adult**  
 985 **mosquito traits fit with quadratic and Brière functions.** The lower of the two DIC values  
 986 (quadratic or Brière model) and  $\Delta$ DIC >2 are bolded.  
 987

| Trait & Fluctuation Regime | Quadratic model | Brière model  | $\Delta$ DIC |
|----------------------------|-----------------|---------------|--------------|
| Bite rate ( <i>a</i> )     |                 |               |              |
| <i>Constant</i>            | -449.7          | <b>-492.4</b> | <b>42.7</b>  |
| <i>DTR 9</i>               | -462.3          | -471.5        | <b>9.2</b>   |
| <i>DTR 12</i>              | -435.2          | -445.1        | <b>9.9</b>   |
| Lifespan ( <i>lf</i> )     |                 |               |              |
| <i>Constant</i>            | <b>3150.9</b>   | 3339.9        | <b>189.0</b> |
| <i>DTR 9</i>               | <b>2436.5</b>   | 2533.1        | <b>96.5</b>  |
| <i>DTR 12</i>              | 2521.5          | 2533.1        | <b>11.6</b>  |
| Lifetime eggs ( <i>B</i> ) |                 |               |              |
| <i>Constant</i>            | <b>4586.7</b>   | 4587.8        | 1.1          |
| <i>DTR 9</i>               | 3507.9          | <b>3506.4</b> | 1.5          |
| <i>DTR 12</i>              | <b>3294.5</b>   | 3296.4        | 1.9          |

988

989 **Table S2. Deviance information criterion (DIC) values used to compare fluctuation**  
 990 **treatments for adult mosquito traits.** Models were fit to data from each fluctuation treatment  
 991 separately, data from all treatments combined (“Combined model”), and data for both fluctuating  
 992 treatments combined (“DTR combined model”). Statistically significant DIC values are bolded.  
 993 Fluctuation treatment was statistically significant for all traits. The magnitude of the fluctuation  
 994 was only significant for lifespan. Medians  
 995

| Trait                      | Constant model | DTR9 model | DTR12 model | Sum of all separate models | Combined model | Sum of DTR models | DTR combined model |
|----------------------------|----------------|------------|-------------|----------------------------|----------------|-------------------|--------------------|
| Bite rate ( <i>a</i> )     | -496.4         | -476.4     | -449.4      | <b>-1422.1</b>             | -1340.9        | -925.7            | -925.5             |
| Lifespan ( <i>lf</i> )     | 3146.2         | 2431.4     | 2516.3      | <b>8094.0</b>              | 8166.2         | <b>4947.8</b>     | 4953.4             |
| Lifetime eggs ( <i>B</i> ) | 4581.1         | 3503.0     | 3289.7      | <b>11373.8</b>             | 11385.2        | 6792.7            | 6793.1             |
| Gamma ( <i>Y</i> )         | -28.9          | -29.0      | -21.3       | <b>-79.1</b>               | -68.2          | -50.3             | -48.9              |

996

997 **Table S3. Properties of thermal performance curves (TPCs) for adult mosquito traits in**  
998 **constant and fluctuating temperatures.** For directly fitted TPCs, parameters ( $q$ ,  $T_{min}$  = thermal  
999 minimum, and  $T_{max}$  = thermal maximum) are for Brière (bite rate) or quadratic (lifespan and  
1000 lifetime egg production) functions. The remaining TPCs were calculated via rate summation  
1001 (RS). Diurnal temperature ranges (DTR) = 9 and 12°C. Values are medians of MCMC posteriors  
1002 (95% credible intervals in parentheses). See main text Figure 2.  
1003

1004

| <b>Trait &amp; Fluctuation Treatment</b> | $q$<br>(°C)                                            | $T_{min}$<br>(°C)   | $T_{max}$<br>(°C)   | $T_{opt}$<br>(°C)    | $T_{breadth}$<br>(°C) |
|------------------------------------------|--------------------------------------------------------|---------------------|---------------------|----------------------|-----------------------|
| <b>Bite rate (<math>a</math>)</b>        |                                                        |                     |                     |                      |                       |
| <i>Constant</i>                          | 1.62·10 <sup>-4</sup><br>(1.39–2.06·10 <sup>-4</sup> ) | 2.30<br>(0.11–6.26) | 42.2<br>(40.5–44.3) | 34.0 (32.8–<br>35.6) | 40.0<br>(34.6–43.6)   |
| <i>Empirically fit DTR 9</i>             | 1.66·10 <sup>-4</sup><br>(1.41–2.13·10 <sup>-4</sup> ) | 1.55<br>(0.06–5.38) | 37.0<br>(35.5–39.3) | 29.8<br>(28.7–31.5)  | 35.5<br>(30.5–38.6)   |
| <i>Empirically fit DTR 12</i>            | 1.52·10 <sup>-4</sup><br>(1.19–2.15·10 <sup>-4</sup> ) | 2.66<br>(0.13–7.4)  | 39.1<br>(36.5–43.4) | 31.6<br>(29.8–34.9)  | 36.6<br>(29.5–42.3)   |
| <i>RS DTR 9</i>                          | NA                                                     | 0.0<br>(0.0–1.2)    | 45.0<br>(44.5–45.0) | 33.0<br>(31.8–34.7)  | 45.0<br>(43.5–45.0)   |
| <i>RS DTR 12</i>                         | NA                                                     | 0.0<br>(0.0–0.0)    | 45.0<br>(45.0–45.0) | 32.2<br>(31.0–34.0)  | 45.0<br>(45.0–45.0)   |
| <b>Lifespan (<math>lf</math>)</b>        |                                                        |                     |                     |                      |                       |
| <i>Constant</i>                          | 0.10<br>(0.09–0.12)                                    | 1.04<br>(0.04–3.82) | 38.9<br>(38.3–39.8) | 20.0<br>(19.4–21.3)  | 37.9<br>(34.8–39.4)   |
| <i>Empirically fit DTR 9</i>             | 0.12<br>(0.10–0.15)                                    | 1.09<br>(0.48–4.24) | 35.8<br>(34.9–36.9) | 18.5<br>(17.8–19.9)  | 34.7<br>(31.1–36.49)  |
| <i>Empirically fit DTR 12</i>            | 0.14<br>(0.12–0.16)                                    | 0.73<br>(0.02–3.12) | 35.0<br>(34.2–35.9) | 17.9<br>(17.3–19.0)  | 34.2<br>(31.6–35.5)   |
| <i>RS DTR 9</i>                          | NA                                                     | 0.0<br>(0.0–0.0)    | 43.0<br>(42.3–43.8) | 20.0<br>(19.4–21.3)  | 43.0<br>(42.3–43.8)   |
| <i>RS DTR 12</i>                         | NA                                                     | 0.0<br>(0.0–0.0)    | 44.3<br>(43.6–45.0) | 20.1<br>(19.4–21.3)  | 44.3<br>(43.6–45.0)   |
| <b>Lifetime eggs (<math>B</math>)</b>    |                                                        |                     |                     |                      |                       |
| <i>Constant</i>                          | 2.08<br>(1.13–3.13)                                    | 12.4<br>(6.87–14.1) | 37.7<br>(36.9–39.8) | 25.0<br>(22.8–25.9)  | 25.4<br>(23.0–32.3)   |
| <i>Empirically fit DTR 9</i>             | 2.33<br>(0.81–4.30)                                    | 12.3<br>(4.68–14.3) | 35.2<br>(33.4–42.5) | 23.8<br>(21.4–26.0)  | 23.1<br>(19.4–35.7)   |
| <i>Empirically fit DTR 12</i>            | 2.16<br>(0.72–4.26)                                    | 11.9<br>(2.29–14.5) | 34.8<br>(33.1–41.1) | 23.4<br>(19.7–25.1)  | 23.0<br>(19.0–36.6)   |
| <i>RS DTR 9</i>                          | NA                                                     | 7.3<br>(1.8–9.1)    | 41.7<br>(40.9–43.8) | 25.1<br>(22.8–26.0)  | 32.1<br>(34.5–41.3)   |
| <i>RS DTR 12</i>                         | NA                                                     | 5.7<br>(0.2–7.5)    | 43.0<br>(42.2–45.0) | 25.1<br>(22.8–26.0)  | 37.4<br>(35.0–43.6)   |

1005

1006 **Table S4. Predicted thermal suitability for transmission for five different models.** Properties  
 1007 of the thermal performance curves: thermal minimum ( $T_{min}$ ), thermal maximum ( $T_{max}$ ), thermal  
 1008 optimum ( $T_{opt}$ ), and thermal breadth ( $T_{breadth}$ ). Fluctuating models are parameterized with trait  
 1009 TPCs fit directly from empirical data (“Empirical fluctuating”) or are calculated using rate  
 1010 summation (RS). Rate summation was used only for the three traits with empirical data (“Trait-  
 1011 level RS - 3 traits”), for all traits (“Trait-level RS - all traits”), or directly on the TPC for  
 1012 suitability at constant temperatures (“ $S(T)$ -level RS”). Diurnal temperature ranges (DTR) = 9 and  
 1013 12°C. Values are medians of posteriors (95% credible intervals in parentheses). See main text  
 1014 Figure 4.  
 1015

| Suitability Model              | $T_{min}$<br>(°C)   | $T_{max}$<br>(°C)   | $T_{opt}$<br>(°C)   | $T_{breadth}$<br>(°C) |
|--------------------------------|---------------------|---------------------|---------------------|-----------------------|
| Constant                       | 15.0<br>(14.3–15.7) | 36.0<br>(35.1–36.0) | 26.8<br>(26.5–27.2) | 21.0<br>(20.2–21.7)   |
| Empirical fluctuating          |                     |                     |                     |                       |
| <i>DTR 9</i>                   | 15.0<br>(14.3–15.7) | 35.2<br>(33.4–36.1) | 25.6<br>(25.2–26.1) | 20.2<br>(18.2–21.5)   |
| <i>DTR 12</i>                  | 15.0<br>(14.3–15.7) | 34.8<br>(33.2–36.1) | 25.4<br>(25.0–25.9) | 19.8<br>(17.9–21.5)   |
| Trait-level RS - 3 traits      |                     |                     |                     |                       |
| <i>DTR 9</i>                   | 15.0<br>(14.3–15.7) | 36.0<br>(35.9–36.1) | 26.7<br>(26.4–27.1) | 21.0<br>(20.2–21.7)   |
| <i>DTR 12</i>                  | 15.0<br>(14.3–15.7) | 36.0<br>(35.9–36.1) | 26.6<br>(26.3–27.0) | 21.0<br>(20.2–21.7)   |
| Trait-level RS - all<br>traits |                     |                     |                     |                       |
| <i>DTR 9</i>                   | 10.0<br>(9.3–10.7)  | 40.0<br>(39.9–40.1) | 26.6<br>(26.2–26.9) | 30.0<br>(29.2–30.7)   |
| <i>DTR 12</i>                  | 8.4<br>(7.7–9.1)    | 41.3<br>(41.2–41.4) | 26.4<br>(26.0–26.7) | 32.9<br>(32.1–33.6)   |
| $S(T)$ -level RS               |                     |                     |                     |                       |
| <i>DTR 9</i>                   | 10.0<br>(9.3–10.7)  | 40.0<br>(39.9–40.1) | 26.7<br>(26.4–27.1) | 30.0<br>(29.2–30.7)   |
| <i>DTR 12</i>                  | 8.4<br>(7.7–9.1)    | 41.3<br>(41.2–41.4) | 26.9<br>(26.6–27.4) | 32.9<br>(32.1–33.6)   |

1016

1017 **Table S5. Properties of thermal performance curves (TPCs) for other mosquito and**  
 1018 **pathogen traits using data from previous studies in constant conditions.** Parameters ( $q$ ,  $T_{min}$   
 1019 = thermal minimum, and  $T_{max}$  = thermal maximum) are for Brière ( $PDR$  and  $MDR$ ) or quadratic  
 1020 (vector competence and egg-to-adult survival) functions. Values are medians of MCMC  
 1021 posteriors (95% credible intervals in parentheses).

1022  
 1023

| Trait & data source                                    | $q$<br>(°C)                                               | $T_{min}$<br>(°C)   | $T_{max}$<br>(°C)   | $T_{opt}$<br>(°C)   | $T_{breadth}$<br>(°C) |
|--------------------------------------------------------|-----------------------------------------------------------|---------------------|---------------------|---------------------|-----------------------|
| Pathogen dev. rate ( $PDR$ ) <sup>19</sup>             | $5.08 \cdot 10^{-5}$<br>( $4.10$ – $6.89 \cdot 10^{-5}$ ) | 8.59<br>(4.23–12.3) | 43.9<br>(40.7–45.0) | 36.0<br>(33.8–36.9) | 35.3<br>(29.0–40.1)   |
| Vector competence ( $bc$ ) <sup>19</sup>               | $2.22 \cdot 10^{-3}$<br>( $1.24$ – $5.15 \cdot 10^{-3}$ ) | 8.00<br>(0.57–15.4) | 40.0<br>(36.6–44.3) | 24.2<br>(20.8–26.9) | 32.2<br>(21.8–42.2)   |
| Prob. egg to adult survival ( $p_{EA}$ ) <sup>36</sup> | $7.51 \cdot 10^{-3}$<br>( $6.45$ – $8.53 \cdot 10^{-3}$ ) | 15.1<br>(14.3–15.7) | 37.3<br>(36.7–38.1) | 26.2<br>(25.8–26.6) | 22.3<br>(21.3–23.5)   |
| Mosquito dev. rate ( $MDR$ ) <sup>36</sup>             | $1.06 \cdot 10^{-4}$<br>( $1.00$ – $1.13 \cdot 10^{-4}$ ) | 13.3<br>(12.6–14.0) | 36.0<br>(35.9–36.0) | 30.5<br>(30.4–30.6) | 22.6<br>(22.0–23.4)   |

1024

1025 **Figure S1: Sensitivity Analysis 1 of suitability models – partial derivatives.** This approach  
 1026 only works for the models without rate summation (i.e., model 1: Constant T and model 2:  
 1027 Empirical Fluctuating T) because it uses the derivatives of the quadratic and Brière functions and  
 1028 the fitted parameters (Tmin, Tmax, and q) for each trait. See *Methods* for details. (A) Model 1:  
 1029 constant temperature, (B) model 2: empirical DTR 9, (C) model 2: empirical DTR 12.  
 1030

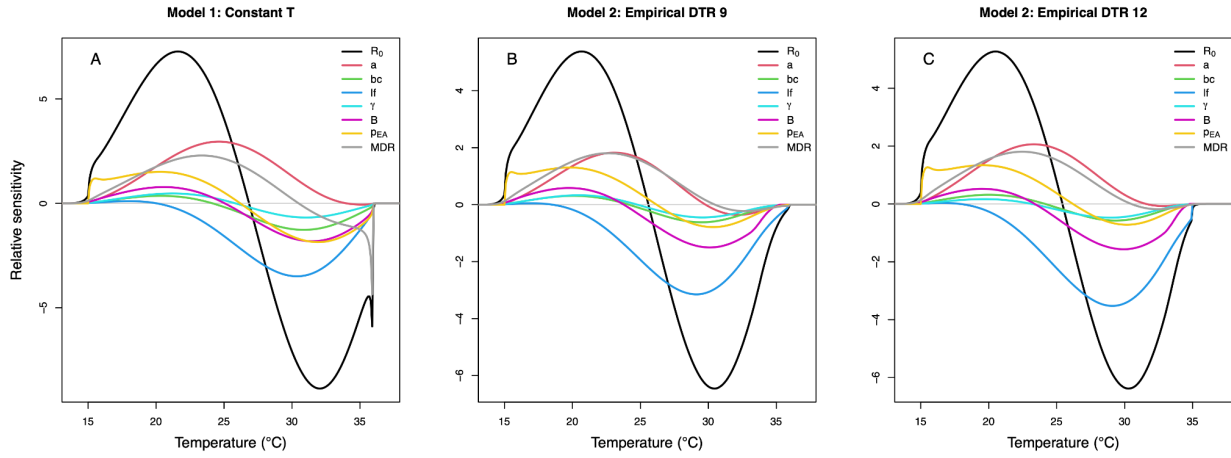

1031



1032 **Figure S2: Sensitivity Analysis 2 of suitability models – holding single parameters constant.**  
 1033 (A) Model 1: constant temperature, (B) model 2: empirical DTR 9, (C) model 2: empirical DTR  
 1034 12, (D) model 3: trait-level rate summation - 3 traits for DTR 9, (E) model 3: trait-level rate  
 1035 summation - 3 traits for DTR 12, (F) model 4: trait-level rate summation - all traits for DTR 9,  
 1036 (G) model 4: trait-level rate summation - all traits for DTR 12, (H) model 5: S(T)-level rate  
 1037 summation for DTR 9, and (I) model 5: S(T)-level rate summation for DTR 12.  
 1038

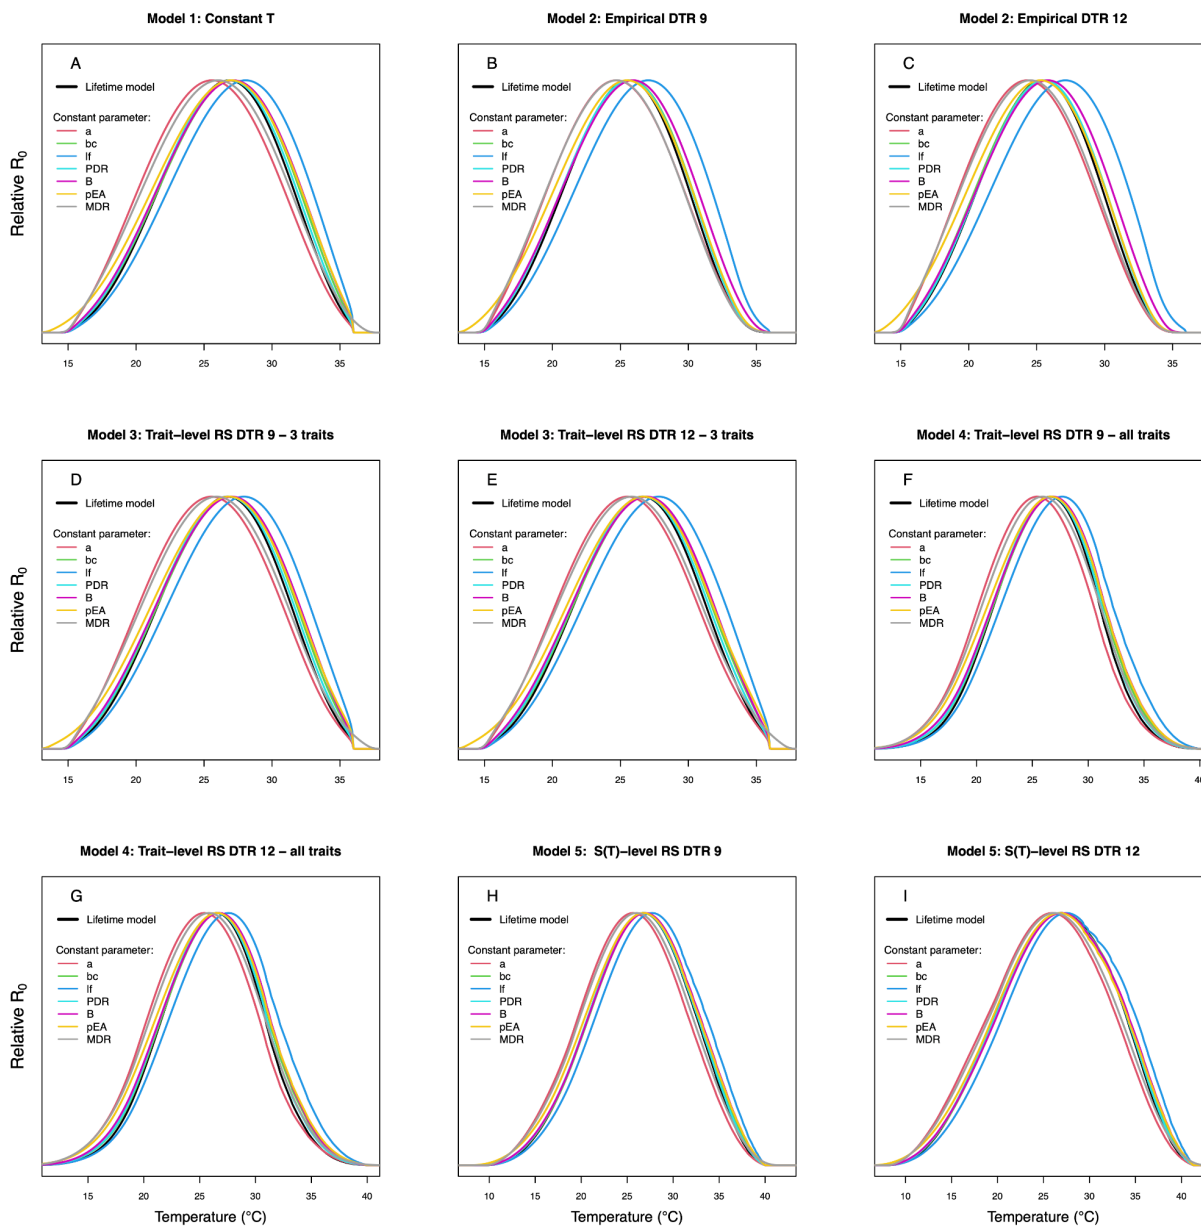

1039

1040 **Figure S3: Uncertainty Analysis of suitability models.** The width in credible intervals due to  
 1041 each parameter. (A) Model 1: constant temperature, (B) model 2: empirical DTR 9, (C) model 2:  
 1042 empirical DTR 12, (D) model 3: trait-level rate summation - 3 traits for DTR 9, (E) model 3:  
 1043 trait-level rate summation - 3 traits for DTR 12, (F) model 4: trait-level rate summation - all traits  
 1044 for DTR 9, (G) model 4: trait-level rate summation - all traits for DTR 12, (H) model 5: S(T)-  
 1045 level rate summation for DTR 9, and (I) model 5: S(T)-level rate summation for DTR 12.  
 1046

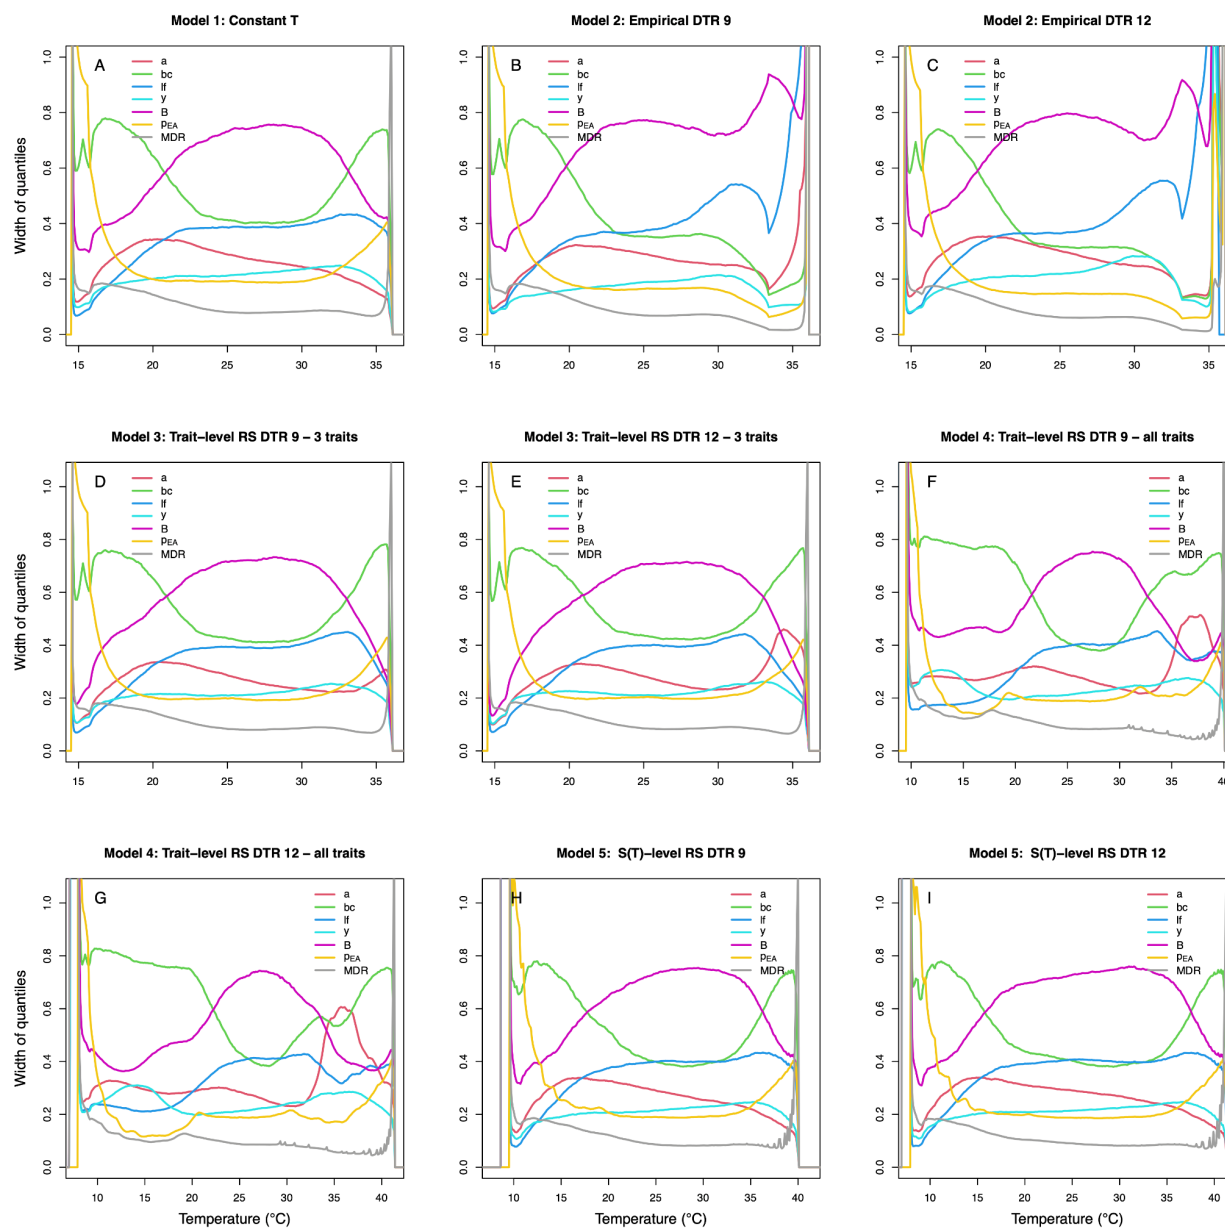

1047  
 1048

## 1049 Supplemental Methods

### 1050 Trait TPC model specifications

1051 In the following models, the subscript  $i$  denotes values corresponding to each individual-  
 1052 level observation. The temperature-dependent mean trait value ( $\mu_i$ ) is defined by either a quadratic  
 1053 or Brière function. The inequalities are used to restrict the trait values to zero where the  
 1054 temperature is greater than  $T_{max}$  or less than  $T_{min}$ . The other parameters ( $\tau$ ,  $s$ ,  $r$ , and  $p$ ) are used to  
 1055 define the relevant probability distribution and relate it to  $\mu_i$ . The corresponding code can be found  
 1056 in the project GitHub repository.

1057

1058 *Normal likelihood truncated at 0 with Brière function for bite rate*

1059  $\text{bite rate}_i \sim \text{normal}(\mu_i, \tau) \text{ truncated}(0,)$

1060  $\mu_i = cT(T-T_{min})(T_{max}-T)^{1/2}(T > T_{min})(T < T_{max})$

1061

1062 *Negative binomial likelihood with quadratic function for lifespan*

1063  $\text{lifespan}_i \sim \text{gamma}(s_i, r)$

1064  $s_i = r * \mu_i$

1065  $\mu_i = -c(T-T_{min})(T-T_{max})(T > T_{min})(T < T_{max})$

1066

1067 *Gamma likelihood with quadratic function for lifetime egg production*

1068  $\text{egg}_i \sim \text{negative binomial}(p_i, r)$

1069  $p_i = r / (r + \mu_i)$

1070  $\mu_i = -c(T-T_{min})(T-T_{max})(T > T_{min})(T < T_{max})$

1071 **Parton-Logan model for diurnal temperature fluctuations**

1072 To simulate a stereotypical profile of temperature fluctuation around a temperature mean  
 1073 through the course of a 24-hour period, we programmed our incubator using a Parton-Logan model  
 1074 <sup>66</sup> to run 10 daily temperature fluctuation profiles. Profiles fluctuated at the hourly scale with a  
 1075 diurnal temperature range (DTR) of either 9 or 12°C around five mean temperatures (16, 20, 24,  
 1076 28, or 32°C; **Figure 1**). Parton-Logan models assume a sinusoidal relationship with temperature  
 1077 during the day ( $T_{day}$ ) that peaks at a maximum temperature ( $T_{max}$ ), followed by an exponential  
 1078 decay during the night ( $T_{night}$ ; **Equation S1**) that asymptotes at the minimum temperature ( $T_{min}$ ).

$$1079 \quad T_{day}(m) = T_{min} + (T_{max} - T_{min}) \sin\left(\frac{\pi m}{Y + 2a}\right) \quad \text{Eq. S1A}$$

$$1080 \quad T_{night}(n) = \frac{T_{min} - T_{sunset} \cdot e^{\frac{-Z}{\tau}} + (T_{sunset} - T_{min})e^{\frac{-n}{\tau}}}{1 - e^{\frac{-Z}{\tau}}} \quad \text{Eq. S1B}$$

1081 Note these definitions of  $T_{min}$  and  $T_{max}$  differ from those used elsewhere in the paper, which  
 1082 describe the thermal limits of a TPC. For a given temperature regime,  $T_{sunset}$  is calculated as the  
 1083 final temperature predicted by **Equation S1A** and then used to parameterize **Equation S1B**. We  
 1084 assumed a day length ( $Y$ ) and night length ( $Z$ ) of 12 hours each, such that the ratio of light to dark  
 1085 hours was 12:12. The day constant ( $a = 1.5$ ) sets the period of the sine wave and thus determines  
 1086 the timing of  $T_{max}$ , (where larger  $a$  delays  $T_{max}$ ), while the night constant ( $\tau = 4$ ) adjusts the timing  
 1087 of the exponential decay (where smaller  $\tau$  results in a faster decay). The inputs  $m$  and  $n$ , denote the  
 1088 number of hours after sunrise and sunset, respectively, are used to calculate the desired sequence  
 1089 of hourly temperatures over time. Finally, the mean of  $T_{min}$  and  $T_{max}$  do not exactly equal the  
 1090 mean daily temperature predicted by this model.

1091 With this model, the mean daily temperature ( $T_{mean}$ ) is close but not exactly equal to the  
1092 mean of  $T_{min}$  and  $T_{max}$ . Thus, in order to parameterize the model for a specific mean temperature,  
1093 you cannot determine  $T_{min}$  and  $T_{max}$  simply by subtracting or adding (respectively) half the DTR to  
1094 the desired  $T_{mean}$  – a small corrective factor ( $c$ ) must also be used. This corrective factor is scaled  
1095 by the DTR and is specific to a given day length. For a 12:12 day:night cycle,  $c = 0.0575824$  and  
1096 is used according to:

$$1097 \quad T_{min} = T_{mean} - \frac{DTR}{2} - c \cdot DTR \quad \text{Eq. S2A}$$

$$1098 \quad T_{max} = T_{mean} + \frac{DTR}{2} - c \cdot DTR \quad \text{Eq. S2B}$$
